# Supplementary material for: Appreciative Inquiry: A Strategy for Change in Systemic Leadership that Builds on Organizational Strengths, Not Deficits.
Source: Springer Nature journal article supplement (doi:10.1186/s13072-016-0089-x), 2005-02-01
Supplement: MOESM3 [file 13072_2016_89_MOESM3_ESM.docx.gz › 13072_2016_89_MOESM3_ESM.docx]

*Table S2:*

The quality and multiplexability of *T2C* is shown by a detailed overview of the regions investigated (grouped) on one capture array, of the homo sapiens (HS) and mus musculus (MM) genomes, with their chromosome and chromosomal position and size, the use of which first and second restriction enzyme or in case of very high resolution sonication, as well as the average fragment size calculated from , and the number of oligos per region. The “name” of the region gives the borders with respect to the ideogram bands.

| **Capture**  **Array**  **Grouping** | **Region**  **“Name”** | **Chromosome**  **[N]** | **Chromosomal**  **Position** | | **Region Size**  **LRegion**  **[bp]** | **Restriction Enzymes**  **or**  **Sonication** | | **Number**  **of**  **Frag-ments**  **NFragment**  **[N]** | **Average**  **Frag-ment**  **Size**  **LFragment**  **[bp]** | **Number**  **of**  **Capt-uring**  **Oligos**  **NOligos**  **[N]** |
| --- | --- | --- | --- | --- | --- | --- | --- | --- | --- | --- |
| **Start**  **[bp]** | **End**  **[bp]** | **1st RE** | **2 nd RE/**  **Sonication** |
| single  capture array | 11p 15.4-15.5 | HS 11 | 1,110,650 | 3,216,350 | 2,105,700 | BglII | NlaIII | 344 | 6121 02612 | 525 |
| single  capture array | q E3-F1 | MM 7 | 109,876,350 | 111,966,600 | 2,090,250 | HindIII | NlaIII | 719 | 2915 | 800 |
|  | | | | | | | | | | |
| single  capture array | 3q A3-B | MM 3 | 32,548,927 | 36,548,927 | 4,000,000 | ApoI | sonication | 7,079 | 565 | 10,827 |
| 3q F1-F2.2 | MM 3 | 92,363,599 | 97,863,599 | 5,500,000 | 9,045 | 608 | 12,353 |
| 4q B1-B3 | MM 4 | 50,792,682 | 57,292,682 | 6,500,000 | 12,296 | 528 | 18,776 |
| 6q C1 | MM 6 | 64,999,977 | 70,999,977 | 6,000,000 | 13,466 | 445 | 13,737 |
| 6q F1-F3 | MM 6 | 119,932,440 | 125,432,440 | 5,500,000 | 9,292 | 591 | 11,780 |
| 7q C | MM 7 | 62,627,388 | 69,127,388 | 6,500,000 | 14,438 | 450 | 18,746 |
| q E3-F1 | MM 7 | 106,961,038 | 117,461,038 | 10,500,000 | 19,405 | 541 | 26,024 |
| 10q A2-A4 | MM 10 | 17,344,736 | 23,844,736 | 6,500,000 | 11,613 | 559 | 17,360 |
| 10q B4-B5.3 | MM 10 | 63,148,728 | 69,148,728 | 6,000,000 | 11,135 | 538 | 17,382 |
| 10q D3 | MM 10 | 125,635,645 | 130,135,645 | 4,500,000 | 7,437 | 605 | 10,773 |
| 11q A3.3-A5 | MM 11 | 29,683,511 | 37,183,511 | 7,500,000 | 11,726 | 639 | 18,387 |
| 12q F1-F2 | MM 12 | 110,657,161 | 118,657,161 | 8,000,000 | 12,108 | 660 | 16,156 |
| 14q B-C2 | MM 14 | 43,002,529 | 52,502,529 | 9,500,000 | 17,216 | 551 | 19,788 |
| 16q A2-B1 | MM 16 | 16,061,845 | 22,061,845 | 5,000,000 | 9,377 | 533 | 13,444 |
| 17q B1-B2 | MM 17 | 33,143,007 | 41,143,007 | 8,000,000 | 15,621 | 512 | 19,308 |
|  |  |  |  | ========  total  99,500,00 | =======  total  181,254 | ====  average 549 | ======  total  244,841 |
