# Supplementary material for: Appreciative Inquiry: A Strategy for Change in Systemic Leadership that Builds on Organizational Strengths, Not Deficits.
Source: Springer Nature journal article supplement (doi:10.1186/s13072-016-0089-x), 2005-02-01
Supplement: MOESM18 [file 13072_2016_89_MOESM18_ESM.docx.gz › 13072_2016_89_MOESM18_ESM.docx]

*Table S6:*

General consensus loop sizes and thus position relative to the start of the first loop at the first loop base determined for mouse MEL cells of one part of the IGH locus at 12q F1-F2. The subchromosomal domain size is calculated for domains with defined borders only from the sum of the loop sizes present.

| ***Loop***  ***[#]*** | ***Loop Size***  ***[kbp]*** | ***Domain/Linker***  ***[#] [kbp]*** |
| --- | --- | --- |
| 1 | 33.8 | Domain 1  333.3 |
| 2 | 47.5 |
| 3 | 52.7 |
| 4 | 38.7 |
| 5 | 22.0 |
| 6 | 23.4 |
| 7 | 38.6 |
| 8 | 38.7 |
| 9 | 37.8 |
| Average  StdDev  StdErr | 37.0±9.9±3.3 | Loops |
