# Supplementary material for: Appreciative Inquiry: A Strategy for Change in Systemic Leadership that Builds on Organizational Strengths, Not Deficits.
Source: Springer Nature journal article supplement (doi:10.1186/s13072-016-0089-x), 2005-02-01
Supplement: MOESM21 [file 13072_2016_89_MOESM21_ESM.docx.gz]

Archive with 1 entries (1 files):
- 13072_2016_89_MOESM21_ESM.docx
