# Supplementary material for: Appreciative Inquiry: A Strategy for Change in Systemic Leadership that Builds on Organizational Strengths, Not Deficits.
Source: Springer Nature journal article supplement (doi:10.1186/s13072-016-0089-x), 2005-02-01
Supplement: MOESM22 [file 13072_2016_89_MOESM22_ESM.docx.gz › 13072_2016_89_MOESM22_ESM.docx]

*Table S7:*

Simulated chromosome models with their physical properties (as in detail described Knoch, 1998; Knoch 2002; Knoch, submitted; Knoch submitted): The band number is the number of subcompartments or loops per chromosome. The average theoretic loop size is and was determined from simulated position dependent (PD) and independent (PI) spatial distances for genomic separations at half the loop size. The average simulated band size is the average extension of the mass distribution. The average theoretic band distance is and was simulated from the average spatial distance averages between succeeding subcompartments. The average theoretic territory size is and was simulated from the average mass distribution extension. Naming of models: [model name]-[loop length]-[linker length].

| **Model** | **Loop properties** | | | | | **Linker properties** | | **Band properties** | | | **Mean band distance** | | **Mean territory size** | |
| --- | --- | --- | --- | --- | --- | --- | --- | --- | --- | --- | --- | --- | --- | --- |
| Size  LS  [Mbp] | Length  LL  [µm] | Theoretic  Spatial  Size  [nm] | Simulated  PI-Spatial  Size  [nm] | Simulated  PD-Spatial  Size  [nm] | Size  LIS  [Mbp] | Length  LIL  [µm] | # of  bands  per  chrosome  NB  [N] | # of  loops  per  rosette  [N] | Simulated  band size  [nm] | Theoretic  <RB>  [nm] | Simulated  <RB>  [nm] | Theoretic  <RLtotal>  [µm] | Simulated  <RLtotal>  [µm] |
| MLS-84-126 | 0.084 | 0.8 | 490 | 230 | 195 | 0.126 | 1.2 | 96 | 11.8±6.8 | 420 | 600 | 615 | 5.85 | 5.9 |
| MLS-105-126 | 0.105 | 1.0 | 548 | 270 | 240 | 0.126 | 1.2 | 96 | 9.2±5.2 | 500 | 600 | 622 | 5.85 | 6.0 |
| MLS-126-63 | 0.126 | 1.2 | 600 | 320 | 275 | 0.063 | 0.6 | 96 | 7.9±4.3 | 700 | 424 | 520 | 3.13 | 4.0 |
| MLS-126-126 | 0.126 | 1.2 | 600 | 320 | 275 | 0.126 | 1.2 | 96 | 7.5±4.3 | 700 | 600 | 630 | 5.85 | 6.1 |
| MLS-126-189 | 0.126 | 1.2 | 600 | 320 | 275 | 0.189 | 1.8 | 96 | 7.1±4.3 | 700 | 734 | 720 | 7.16 | 7.3 |
| MLS-126-252 | 0.126 | 1.2 | 600 | 320 | 275 | 0.252 | 2.4 | 96 | 6.5±4.3 | 700 | 848 | 870 | 8.27 | 8.4 |
| MLS-158-126 | 0.158 | 1.5 | 671 | 350 | 300 | 0.126 | 1.2 | 96 | 6.1±3.6 | 600 | 600 | 625 | 5.85 | 5.9 |
| MLS-252-126 | 0.252 | 2.4 | 848 | 425 | 375 | 0.126 | 1.2 | 96 | 3.8±2.0 | 860 | 600 | 610 | 5.85 | 5.8 |
|  | | | | | | | | | | | | | | |
| RW/GL-126-63 | 0.126 | 1.2 | 600 | 330 | 285 | 0.063 | 0.6 | 561 | - | - | 424 | 450 | 10.0 | 9.7 |
| RW/GL-252-63 | 0.252 | 2.4 | 848 | 430 | 405 | 0.063 | 0.6 | 338 | - | - | 424 | 440 | 7.79 | 7.3 |
| RW/GL-504-63 | 0.504 | 4.8 | 1200 | 610 | 595 | 0.063 | 0.6 | 187 | - | - | 424 | 439 | 5.79 | 5.6 |
| RW/GL-1000-126 | 1.0 | 10 | 1732 | 885 | 870 | 0.126 | 1.2 | 94 | - | - | 600 | 620 | 5.82 | 6.3 |
| RW/GL-2000-189 | 2.0 | 20 | 2449 | 1320 | 1300 | 0.189 | 1.8 | 48 | - | - | 734 | 740 | 5.09 | 5.8 |
| RW/GL-3000-252 | 3.0 | 30 | 3000 | 1530 | 1515 | 0.252 | 2.4 | 33 | - | - | 848 | 840 | 4.80 | 5.6 |
| RW/GL-4000-315 | 4.0 | 40 | 3264 | 1890 | 1880 | 0.315 | 3.0 | 25 | - | - | 948 | 960 | 4.64 | 6.4 |
| RW/GL-5000-378 | 5.0 | 50 | 3873 | 2240 | 2235 | 0.378 | 3.6 | 20 | - | - | 1000 | 1010 | 4.53 | 7.0 |
